# Supplementary material for: Circadian and Ultradian Rhythms of Free Glucocorticoid Hormone Are Highly Synchronized between the Blood, the Subcutaneous Tissue, and the Brain
Source: PubMed Central journal article supplement — Endocrinology. 2012 Jul 20;153(9):4346–53. doi: 10.1210/en.2012-1484 (PMC3480985; doi:10.1210/en.2012-1484), 2012-07-20
Supplement: supp_en.2012-1484_EN-12-1484_Suppl.pdf [file supp_en.2012-1484_EN-12-1484_Suppl.pdf]

1  
2  
3  
4  
5  
6  
7  
8  
9  
10  
11  
12  
13  
14  
15  
16  
17  
18  
19  
20  
21  
22  
23  
24  
25  
26

**Circadian and ultradian rhythms of free glucocorticoid hormone are highly synchronized between the blood, the subcutaneous tissue and the brain**

Xiaoxiao Qian, Susanne K. Droste, Stafford L. Lightman, Johannes M.H.M. Reul, and Astrid C.E. Linthorst

**Supplemental Information**

**A. Full description of surgical procedures, experimental designs and corticosterone assay**

**Animals**

Male Wistar rats (body weight approximately 175-200 g) were purchased from Harlan (Loughborough, UK). Rats were housed three per cage under standard lighting (14/10-hours light/dark cycle, lights on at 05:00 h) and temperature (21-22 °C) conditions. Food and water were available *ad libitum*. Rats were handled once per day (about 5 min per rat) starting one week before surgery. At the time of surgery, the body weight of the rats was approximately 250 g. All procedures were carried out in accordance with the Animals (Scientific Procedures) Act 1986. The experimental protocols were designed to minimize animal suffering and numbers of animals used and were approved by the Ethical Review Group of the University of Bristol and the Home Office, United Kingdom.

**Protocol-1: Single-probe microdialysis in the blood or the subcutaneous tissue**

**Surgical and microdialysis procedures**

To investigate the biological rhythms of free corticosterone levels in different peripheral compartments on two consecutive days, we performed single-probe *in vivo* microdialysis in freely

27 behaving rats and collected dialysate samples from either the blood (jugular vein) or the subcutaneous  
28 tissue. In a first group of rats, a microdialysis probe (CMA20 Elite: membrane polyarylethersulfone;  
29 20 kDa cut-off; length 10 mm; membrane diameter 0.5 mm; *in vitro* recovery of free corticosterone  
30  $51.5 \pm 2.2\%$  (n=6) at 37°C; CMA Microdialysis, Stockholm, Sweden) was inserted into the jugular  
31 vein under isoflurane (Merial Animal Health Ltd., Harlow, UK) anesthesia. The inlet and outlet  
32 tubing of the probe were tunneled under the skin to the neck region and secured. In a second group of  
33 rats, a microdialysis probe (with the same specifications as above) was inserted under the skin of the  
34 neck region and secured. Dental cement and anchor screws were used to fix a small metal peg (for  
35 later connection to a liquid swivel) to the skull. The skin was closed with surgical silk (4.0, Ethicon,  
36 Somerville, NJ, USA) and carprofen (Rimadyl, 4 mg/kg, s.c., Pfizer, Sandwich, UK) was given for  
37 post-operative pain relief. After surgery, animals were housed individually in Plexiglas cages (length  
38  $\times$  width  $\times$  height = 27  $\times$  27  $\times$  35 cm) with food and water *ad libitum* and connected to a dual-channel  
39 liquid swivel and counterbalance arm system (Microbiotech AB, Stockholm, Sweden) via the peg on  
40 the head. This system allows the animals to move freely in all three dimensions, including full rearing  
41 and sleeping in a curled-up body posture. Probes were perfused with sterile, pyrogen-free Ringer  
42 solution (147 mM NaCl, 4 mM KCl, 2.25 mM CaCl<sub>2</sub>; Delta Pharma, Pfullingen, Germany) at 2.05  
43  $\mu$ l/min using a microinfusion pump (KD Scientific, Holliston, MA, USA). The syringes with the  
44 perfusion fluid were filled each day between 08:00-09:00 h. Fluorethylenepolymer tubing  
45 (Microbiotech AB, Stockholm, Sweden) with a dead volume of 1.2  $\mu$ l/100 mm length was used for all  
46 connections. Dead volumes were taken into account during sample collection.

#### 47 Experimental design

48 Two days after insertion of the microdialysis probe in the peripheral compartment, sampling started at  
49 09:00 h and continued for 47 hours. Microdialysis samples were collected in intervals of 10 min  
50 (between 09:00 – 21:00 h) or 30 min (between 21:00 – 08:00 h). During the whole experiment  
51 animals were left undisturbed in their home cages. Microdialysis samples were collected in pre-cooled  
52 vials using automated refrigerated sample collectors (CMA470, CMA Microdialysis). The samples  
53 were stored at –80 °C for later determination of the concentrations of corticosterone. Experiments  
54 were performed on six animals simultaneously.

55 **Protocol-2: Simultaneous dual-probe microdialysis in the blood and the subcutaneous tissue**

56 Surgical and microdialysis procedures

57 To directly compare the biological rhythms of free corticosterone in the blood and in a peripheral  
58 target compartment, we performed dual-probe *in vivo* microdialysis in freely behaving rats and  
59 collected samples from the blood (jugular vein) and the subcutaneous tissue simultaneously. Rats  
60 were prepared for microdialysis as described under Protocol-1 with the exception that each animal  
61 received microdialysis probes in both the jugular vein and the subcutaneous tissue during the same  
62 surgery. After surgery, animals were housed individually in Plexiglas cages (as above) with food and  
63 water *ad libitum* and were connected to a motorized 5-channel swivel and counterbalance arm system  
64 (MCS/5A; Instech Laboratories Inc., Plymouth Meeting, PA, USA) via the peg on the head. Similar to  
65 the dual-channel swivel system, this 5-channel system allows the animals to move freely in all three  
66 dimensions. Importantly, the power-assisted swivel has a low torque despite its 5-channel design and  
67 follows the movements of the rats accurately. Probes were connected and perfused as described under  
68 Protocol-1.

69 Experimental design

70 Two days after insertion of the microdialysis probes, sampling started at 09:00 h and continued for 20  
71 h. Microdialysis samples were collected in intervals of 10 min (between 09:00 – 21:00 h) or 30 min  
72 (between 21:00 – 05:00 h). During the whole experiment animals were left undisturbed in their home  
73 cages. Samples were collected and stored as described under Protocol-1.

74

75 **Protocol-3: Simultaneous dual-probe microdialysis in the blood and the hippocampus**

76 Surgical and microdialysis procedures

77 To directly compare the biological rhythms of free corticosterone in the blood and the brain, we  
78 performed dual-probe *in vivo* microdialysis in freely behaving rats and collected samples from the  
79 blood (jugular vein) and the hippocampus simultaneously. Nine days before the start of the  
80 experiment, under isoflurane anesthesia, a guide cannula (CMA12 Guide Cannula, CMA

81 Microdialysis) was implanted just entering the hippocampus at the dorsal site. Hippocampal  
82 coordinates based on the rat atlas of Paxinos and Watson (1) with the tooth bar set at -3.3 mm and  
83 bregma as overall zero were posterior 5.2 mm, lateral 5.0 mm, and ventral 4.0 mm. Dental cement and  
84 anchor screws were used to fix a peg to the skull as described under Protocol-1. Carprofen was given  
85 for post-operative pain relief. After surgery, animals were housed individually in Plexiglas cages (as  
86 above) with food and water *ad libitum*. After seven days of recovery, a microdialysis probe (CMA12  
87 Elite Microdialysis Probe: polyarylethersulfone membrane, 20 kDa cut-off, length 4 mm; membrane  
88 diameter 0.5 mm; *in vitro* recovery of free corticosterone  $27.0 \pm 1.7$  % (n=6) at 37°C; CMA  
89 Microdialysis) was inserted through the guide cannula into the hippocampus and a peripheral  
90 microdialysis probe (CMA20 Elite Microdialysis Probe: see above; length 4 mm; recovery rate  $27.0 \pm$   
91  $2.8$  % (n=6) at 37°C; CMA Microdialysis) was inserted into the jugular vein under isoflurane  
92 anesthesia. Carprofen was given for post-operative pain relief. The rats were connected to a 5-channel  
93 swivel and counterbalance arm system as described under Protocol-2. Probes were connected and  
94 perfused as described under Protocol-1.

#### 95 Experimental design

96 Two days after insertion of the microdialysis probes, sampling started at 09:00 h and continued for 20  
97 h. Microdialysis samples were collected in intervals of 10 min (between 09:00 – 21:00 h) or 30 min  
98 (between 21:00 – 05:00 h). During the whole experiment animals were left undisturbed in their home  
99 cages. Samples were collected and stored as described under Protocol-1.

100

#### 101 **Histology**

102 After the completion of the experiments described under Protocol 3, animals were killed using an  
103 overdose of pentobarbital (Euthatal, 200 mg/kg body weight, i.p., Merial). The brains were collected  
104 and stored in a 4% paraformaldehyde fixative solution. Brains were cut into 50  $\mu$ m sections using a  
105 cryostat and stained with Cresyl Violet to verify the localization of the microdialysis probe in the  
106 hippocampus as described previously (2). No misplacements were found.

107

## 108 **Measurement of corticosterone**

109 Dialysate corticosterone concentrations were measured in undiluted samples using a <sup>125</sup>I-  
110 corticosterone radioimmunoassay (MP Biomedicals, Solon, OH, USA)(2) and expressed as µg/dl  
111 dialysate. In addition to running the standard curve supplied by the manufacturer for quality control  
112 purposes, a separate standard curve of freshly prepared corticosterone solutions in Ringer solution  
113 (i.e. the physiological solution used in the microdialysis experiments), spanning the free  
114 corticosterone dialysate concentration range, was used. Because of the small sample volumes, the  
115 volumes of the assay reagents were adjusted (25% of the volumes stated in the manufacturer's  
116 instruction) but their ratio remained the same. For the standards 25 µl was used; for 10-min samples,  
117 15 µl dialysate was used and 10 µl Ringer solution was added (concentrations were corrected for the  
118 added Ringer); for 30-min samples, 25 µl dialysate was used. The detection limit was 0.00125 µg/dl;  
119 the inter- and intra-assay variations were 16 and 14%, respectively (3). Dialysate corticosterone  
120 concentrations were not corrected for probe recovery. There were only rare occasions that sample  
121 values were "off-curve". Off curve values were not replaced. To calculate pulse characteristics, a "-1"  
122 was placed for each missing value in the Excel datasheet, which was subsequently recognized and  
123 treated by the PULSAR program as a missing value.

124

## 125 **References**

126

- 127 1. **Paxinos G, Watson C** 1982 The rat brain in stereotactic coordinates. Sydney: Academic Press
  
- 128 2. **Linthorst ACE, Flachskamm C, Holsboer F, Reul JMHM** 1994 Local administration of  
129 recombinant human interleukin-1 beta in the rat hippocampus increases serotonergic  
130 neurotransmission, hypothalamic-pituitary-adrenocortical axis activity, and body temperature.  
131 *Endocrinology* 135:520-532

- 132 3. **Droste SK, De Groot L, Atkinson HC, Lightman SL, Reul JMH, Linthorst ACE** 2008  
133 Corticosterone levels in the brain show a distinct ultradian rhythm but a delayed response to  
134 forced swim stress. *Endocrinology* 149:3244-3253

| <b>PROTOCOL-1: single-probe microdialysis</b>            |                           |                                     |                           |                |                |
|----------------------------------------------------------|---------------------------|-------------------------------------|---------------------------|----------------|----------------|
| <b>Compartment</b>                                       | <b>Pulse Parameter</b>    | <b>Effect (main or interaction)</b> | <b>Degrees of freedom</b> | <b>F value</b> | <b>P value</b> |
| Blood                                                    | Pulse frequency           | day                                 | 1,11                      | 8.80           | <0.02          |
|                                                          |                           | time period                         | 1,11                      | 0.98           | n.s.           |
|                                                          |                           | day x time period                   | 1,11                      | 0.0005         | n.s.           |
|                                                          | Mean pulse amplitude      | day                                 | 1,11                      | 0.84           | n.s.           |
|                                                          |                           | time period                         | 1,11                      | 29.12          | ≤0.0005        |
|                                                          |                           | day x time period                   | 1,11                      | 0.284          | n.s.           |
|                                                          | Mean pulse height         | day                                 | 1,11                      | 1.59           | n.s.           |
|                                                          |                           | time period                         | 1,11                      | 68.13          | ≤0.0005        |
|                                                          |                           | day x time period                   | 1,11                      | 0.48           | n.s.           |
|                                                          | Mean free corticosterone  | day                                 | 1,11                      | 4.39           | n.s.           |
|                                                          |                           | time period                         | 1,11                      | 90.04          | ≤0.0005        |
|                                                          |                           | day x time period                   | 1,11                      | 2.37           | n.s.           |
| AUC                                                      | day                       | 1,11                                | 4.46                      | n.s.           |                |
|                                                          | time period               | 1,11                                | 84.42                     | ≤0.0005        |                |
|                                                          | day x time period         | 1,11                                | 2.67                      | n.s.           |                |
| Subcutaneous tissue                                      | Pulse frequency           | day                                 | 1,9                       | 3.47           | n.s.           |
|                                                          |                           | time period                         | 1,9                       | 3.47           | n.s.           |
|                                                          |                           | day x time period                   | 1,9                       | 0.05           | n.s.           |
|                                                          | Mean pulse amplitude      | day                                 | 1,9                       | 1.52           | n.s.           |
|                                                          |                           | time period                         | 1,9                       | 19.46          | <0.01          |
|                                                          |                           | day x time period                   | 1,9                       | 0.53           | n.s.           |
|                                                          | Mean pulse height         | day                                 | 1,9                       | 1.56           | n.s.           |
|                                                          |                           | time period                         | 1,9                       | 52.09          | ≤0.0005        |
|                                                          |                           | day x time period                   | 1,9                       | 2.10           | n.s.           |
|                                                          | Mean free corticosterone  | day                                 | 1,9                       | 2.52           | n.s.           |
|                                                          |                           | time period                         | 1,9                       | 145.44         | ≤0.0005        |
|                                                          |                           | day x time period                   | 1,9                       | 4.05           | n.s.           |
| AUC                                                      | day                       | 1,9                                 | 2.43                      | n.s.           |                |
|                                                          | time period               | 1,9                                 | 115.86                    | ≤0.0005        |                |
|                                                          | day x time period         | 1,9                                 | 3.92                      | n.s.           |                |
| <b>PROTOCOL-2: dual-probe microdialysis in periphery</b> |                           |                                     |                           |                |                |
| <b>Compartment</b>                                       | <b>Pulse Parameter</b>    | <b>Effect (main or interaction)</b> | <b>Degrees of freedom</b> | <b>F value</b> | <b>P value</b> |
| Blood and subcutaneous tissue                            | Pulse frequency           | compartment                         | 1,5                       | 0.003          | n.s.           |
|                                                          |                           | time period                         | 1,5                       | 0.19           | n.s.           |
|                                                          |                           | compartment x time period           | 1,5                       | 2.77           | n.s.           |
|                                                          | Mean pulse amplitude      | compartment                         | 1,5                       | 0.89           | n.s.           |
|                                                          |                           | time period                         | 1,5                       | 18.05          | <0.01          |
|                                                          |                           | compartment x time period           | 1,5                       | 0.34           | n.s.           |
|                                                          | Mean pulse height         | compartment                         | 1,5                       | 3.18           | n.s.           |
|                                                          |                           | time period                         | 1,5                       | 18.58          | <0.01          |
|                                                          |                           | compartment x time period           | 1,5                       | 7.35           | <0.05          |
|                                                          | Mean free corticosterone  | compartment                         | 1,5                       | 4.57           | n.s.           |
|                                                          |                           | time period                         | 1,5                       | 25.79          | <0.01          |
|                                                          |                           | compartment x time period           | 1,5                       | 13.33          | <0.02          |
| AUC                                                      | compartment               | 1,5                                 | 4.62                      | n.s.           |                |
|                                                          | time period               | 1,5                                 | 20.95                     | <0.01          |                |
|                                                          | compartment x time period | 1,5                                 | 7.40                      | <0.05          |                |

| <b>PROTOCOL-3: dual-probe microdialysis in periphery and brain</b> |                          |                                     |                           |                |                |
|--------------------------------------------------------------------|--------------------------|-------------------------------------|---------------------------|----------------|----------------|
| <b>Compartment</b>                                                 | <b>Pulse Parameter</b>   | <b>Effect (main or interaction)</b> | <b>Degrees of freedom</b> | <b>F value</b> | <b>P value</b> |
| Blood and hippocampus                                              | Pulse frequency          | compartment                         | 1,16                      | 0.19           | n.s.           |
|                                                                    |                          | time period                         | 1,16                      | 6.14           | =0.03          |
|                                                                    |                          | compartment x time period           | 1,16                      | 0.12           | n.s.           |
|                                                                    | Mean pulse amplitude     | compartment                         | 1,16                      | 0.39           | n.s.           |
|                                                                    |                          | time period                         | 1,16                      | 36.33          | ≤0.0005        |
|                                                                    |                          | compartment x time period           | 1,16                      | 2.89           | n.s.           |
|                                                                    | Mean pulse height        | compartment                         | 1,16                      | 2.78           | n.s.           |
|                                                                    |                          | time period                         | 1,16                      | 77.89          | ≤0.0005        |
|                                                                    |                          | compartment x time period           | 1,16                      | 7.88           | <0.02          |
|                                                                    | Mean free corticosterone | compartment                         | 1,16                      | 8.38           | <0.02          |
|                                                                    |                          | time period                         | 1,16                      | 125.76         | ≤0.0005        |
|                                                                    |                          | compartment x time period           | 1,16                      | 15.62          | =0.001         |
|                                                                    | AUC                      | compartment                         | 1,16                      | 4.93           | <0.05          |
|                                                                    |                          | time period                         | 1,16                      | 142.80         | ≤0.0005        |
|                                                                    |                          | compartment x time period           | 1,16                      | 16.13          | =0.001         |



137 **C: Table 2: Direct comparison of the circadian and ultradian rhythms of free corticosterone**  
 138 **levels in the blood and the subcutaneous tissue as calculated using the PULSAR algorithm**  
 139 **(Protocol-2, dual-probe microdialysis)**

| Time period (time of day, h) | Compartment         | Pulse frequency (pulse per hour) | Mean pulse amplitude (µg/dl) | Mean pulse height (µg/dl) | Mean free corticosterone (µg/dl) | AUC (arbitrary units)      |
|------------------------------|---------------------|----------------------------------|------------------------------|---------------------------|----------------------------------|----------------------------|
| 09:00-15:00                  | Blood               | 1.15 ± 0.16                      | 0.06 ± 0.02                  | 0.15 ± 0.04               | 0.10 ± 0.03                      | 0.65 ± 0.15                |
|                              | Subcutaneous tissue | 1.04 ± 0.15                      | 0.07 ± 0.02                  | 0.14 ± 0.03               | 0.09 ± 0.02                      | 0.57 ± 0.08                |
| 15:00-21:00                  | Blood               | 1.11 ± 0.11                      | 0.23 ± 0.05**                | 0.46 ± 0.10**             | 0.33 ± 0.07**                    | 1.93 ± 0.41**              |
|                              | Subcutaneous tissue | 1.23 ± 0.08                      | 0.23 ± 0.06 <sup>#</sup>     | 0.40 ± 0.09 <sup>##</sup> | 0.28 ± 0.05 <sup>###</sup>       | 1.64 ± 0.31 <sup>###</sup> |

140

141 Free corticosterone levels were simultaneously monitored in the blood and the subcutaneous tissue by  
 142 dual-probe microdialysis in the same animals. Pulse characteristics were calculated using the  
 143 PULSAR algorithm on data depicted in Figure 2. All rats (n=6) showed significant circadian and  
 144 ultradian rhythms in both compartments during the analyzed 12-hour sampling period between 09:00  
 145 – 21:00 h (10 min interval samples). Post-hoc statistical analysis of the morning/early afternoon  
 146 period (09:00-15:00 h) versus the late afternoon/early night period (15:00-21:00 h) revealed  
 147 significant circadian variations in the pulse amplitude, pulse height, mean free corticosterone level,  
 148 and AUC with higher values attained during the later time period in both compartments. No  
 149 significant circadian variations were found for the pulse frequency in either compartment.  
 150 Importantly, post-hoc statistical analysis revealed no significant differences between the parameters  
 151 calculated for the blood and the subcutaneous tissue, demonstrating the high similarity of the free  
 152 corticosterone rhythms in these peripheral compartments.

153 \*\*, blood: time period 15:00-21:00 h vs. time period 09:00-15:00 h (P<0.0125). <sup>#</sup> and <sup>##</sup>, subcutaneous  
 154 tissue: time period 15:00-21:00 h vs. time period 09:00-15:00 h (P=0.015 and P<0.0125,  
 155 respectively). Paired Student's t-tests with Bonferroni correction. See Table S1 for ANOVA results.  
 156 Values shown are mean ± SEM.

157 **D: Table 3: Direct comparison of the circadian and ultradian rhythms of free corticosterone**  
 158 **levels in the blood and the hippocampus as calculated using the PULSAR algorithm (Protocol-3,**  
 159 **dual-probe microdialysis)**

| Time period (time of day, h) | Compartment | Pulse frequency (pulse per hour) | Mean pulse amplitude (µg/dl) | Mean pulse height (µg/dl) | Mean free corticosterone (µg/dl) | AUC (arbitrary units)        |
|------------------------------|-------------|----------------------------------|------------------------------|---------------------------|----------------------------------|------------------------------|
| 09:00-15:00                  | Blood       | 1.16 ± 0.10                      | 0.03 ± 0.002                 | 0.07 ± 0.01               | 0.04 ± 0.004                     | 0.27 ± 0.03                  |
|                              | Hippocampus | 1.17 ± 0.08                      | 0.04 ± 0.003                 | 0.07 ± 0.01               | 0.04 ± 0.004                     | 0.27 ± 0.03                  |
| 15:00-21:00                  | Blood       | 1.32 ± 0.08                      | 0.09 ± 0.01**                | 0.18 ± 0.01**             | 0.13 ± 0.01**                    | 0.80 ± 0.04**                |
|                              | Hippocampus | 1.38 ± 0.07                      | 0.07 ± 0.01 <sup>##</sup>    | 0.15 ± 0.01 <sup>##</sup> | 0.11 ± 0.01 <sup>##,\$</sup>     | 0.67 ± 0.04 <sup>##,\$</sup> |

160

161 Free corticosterone levels were simultaneously monitored in the blood and the hippocampus by dual-  
 162 probe microdialysis in the same animals. Pulse characteristics were calculated using the PULSAR  
 163 algorithm on data depicted in Figure 3. All rats (n=17) showed significant circadian and ultradian  
 164 rhythms in both compartments during the analyzed 12-hour sampling period between 09:00-21:00 h  
 165 (10 min interval samples). Post-hoc statistical analysis of the morning/early afternoon period (09:00-  
 166 15:00 h) versus the late afternoon/early night period (15:00-21:00 h) revealed significant circadian  
 167 variations in the pulse amplitude, pulse height, mean free corticosterone level, and AUC, but not in  
 168 pulse frequency, with higher values attained during the later time period in both compartments.  
 169 Importantly, post-hoc statistical analysis revealed no significant differences in pulse frequency, pulse  
 170 height and pulse amplitude between the blood and the hippocampus demonstrating the high similarity  
 171 of the ultradian free corticosterone rhythms in these two compartments. However, the mean free  
 172 corticosterone level and the AUC were slightly lower in the hippocampus as compared to the blood  
 173 during the later time period (15:00-21:00 h) only.

174 \*\*, blood: time period 15:00-21:00 h vs. time period 09:00-15:00 h (P<0.0125); <sup>##</sup>, hippocampus: time  
 175 period 15:00-21:00 h vs. time period 09:00-15:00 h (P<0.0125); <sup>\$</sup>, time period 15:00-21:00 h:  
 176 hippocampus vs. blood (P<0.0125)). Paired Student's t-tests with Bonferroni correction. See Table S1  
 177 for ANOVA results. Values shown are mean ± SEM.
